# Supplementary material
Source: HighWire-hosted journal article supplement (https://bmjopen.bmj.com/content/15/2/e084367)
Supplement: inline-supplementary-material-1 [file inline-supplementary-material-1.pdf]

**Supplemental Material: List of Surgical Procedure Codes**

1088 - Arthroscopy, knee, microfracture,  
1089 - Knee, Additional meniscectomy or meniscal repair  
1090 - Knee, debride femoral condyle  
1091 - Knee, debride tibial plateau  
1092 - Knee, patellar, retinacular release  
1094 - Knee, removal of loose body  
0256 - Foreign body subcutaneous tissue, complicated, incision and removal  
0259/0260 - Debridement of full thickness chronic skin ulcer i.e., neuropathic or vascular, down to fascia, bone and/or muscle  
0261 - Major debridement of necrotizing soft tissue infection  
0289/0290/0292/0293 - Repair by adjacent tissue transfer  
0303/0304/0305 - Split skin grafts  
0309 - Full-thickness grafts, free  
0343/0349 - Elevation of free island skin and subcutaneous flap and closure of defect  
0344 - Reimplantation, digit, with or without vein graft  
0350 - Preparation of microvascular recipient site for free island skin subcutaneous flap  
0352 - Dressings, 2<sup>nd</sup> or 3<sup>rd</sup> degree, initial or subsequent, with anesthetic, small or medium  
0358 - Transplantation of free island skin and subcutaneous flap with microvascular anastomosis(es)  
0359 - Non burn dressings, major debridement and dressing, with anesthesia (excluding local anesthesia)  
0380/0381/0382 - Split skin grafts, creation of recipient area  
0387 - Full thickness grafts  
0524 - Cutting, division or transection of bone with or without fixation - calcaneum  
0525 - Bones, removal of plates, pins, wires, screws, etc.  
0530/0531/0536/0537 - Osteotomy, cutting, division or transection of bone  
0557/0558/0561 - Excision of bone, single bone/carpus, proximal row/patella, partial or total  
0565/0566/0567/0572 - Excision of bone cyst, chondroma or exostosis, fibula, radius, ulna/femur, humerus, other bones  
0576/0577 - Osteomyelitis, major, craterization, guttering or saucerization of bone; diaphysectomy, including closed irrigation  
0591 - Bone wiring, Kirschner wire, insertion  
0617/0618/0620/0624 - Bone graft, including obtaining and placing of graft  
0634 - Bone graft, harvesting - iliac bone  
0635/0636 - Decompression, spine, multiple vertebrae  
0742 - Fractures, spine and trunk, clavicle, open reduction  
0782/0787/0790/0794/0801/0805/0810/0811/0816/0819/0823/0830/0844/0848/0854/0868 - Fractures, upper extremity, open reduction  
0874/0883/0897/0904/0910/0912/0916/0928/0935/0937/0941/0942/0946/0963/0970/0982/0989 - Fractures, lower extremity, open reduction  
1001/1002/1003/1006/1008/1010/1013/1017 - Joints, arthrotomy or capsulotomy  
1025 - Diagnostic arthroscopy shoulder (independent procedure)

1027 - Arthroscopy shoulder with therapeutic intervention  
1028 - Synovectomy shoulder - complete  
1029 - Subacromial decompression  
1030 - Distal clavicle excision  
1032 - Stabilization for recurrent sternoclavicular, acromioclavicular instability  
1033/1034 - Glenohumeral stabilization  
1035 - Superior Labrum Anterior - Posterior (SLAP) repair  
1036 - SLAP and anterior or posterior glenohumeral stabilization  
1037/1038 - Rotator cuff repair and/or SLAP repair  
1039 - Revision rotator cuff repair  
1042 - Rotator cuff repair with tendon graft  
1043 - Circumferential glenohumeral stabilization  
1045 - Major release glenohumeral joint (for arthrofibrosis/adhesive capsulitis)  
1050 - Joints, arthroscopy (with or without biopsy), large joint  
1074 - Joints, atherectomy, excision of lumbar intervertebral disc  
1080 - Arthroscopy knee joint  
1100 - Morsellized bone graft (allograft, not synthetic bone graft, to one or more sites)  
1103 - Joints, synovectomy, ankle  
1104 - Joints, synovectomy, wrist  
1105 - Orthopedics, cervical, 2 - C7 two vertebrae  
1111/1114/1115 - Orthopedics, decompression (cervical, thoracic, lumbar)  
1121/1122/1123 - Orthopedics, posterior or posterolateral fusion (cervical, thoracic, lumbar)  
1126 - Orthopedics, intervertebral disc replacement  
1133 - Orthopedics, bone graft, onlay graft for posterior lateral fusion  
1139 - Orthopedics, odontoid fracture, open vertebroplasty  
1144 - Arthroplasty, finger  
1168/1170/1177 - Joints, arthrodesis, fusion of joint, with or without bone graft  
1171 - Artificial disc insertion  
1180 - Radial head arthroplasty only with implant  
1182 - Primary total arthroplasty - 2 or 3 components  
1184 - Joints, atherectomy, other joints, lower extremity  
1185 - Joints, arthrodesis, foot, triple arthrodesis, unilateral  
1191 - Joints, atherectomy, acromionectomy  
1200 - Shoulder, total arthroplasty with glenoid and humeral components  
1201/1202 - Suture or repair of joint capsule (capsulorrhaphy), shoulder  
1209 - Removal of hardware, (plates, pins, wires, screws, etc.) from the spine  
1210 - Complete spinal duraplasty requiring application of a graft for tears  
1211-1218/1220 - Suture or repair of joint capsule (capsulorrhaphy), knee  
1252 - Midfoot joint arthrodesis  
1292/1297/1301/1357/1363/1378 - Dislocation, open reduction  
1390 - Arthroscopy, elbow with therapeutic intervention  
1402 - Total knee arthroplasty, with patellar resurfacing  
1408/1409 - Revision knee arthroplasty with removal and replacement  
1415 - Total hip arthroplasty

1431 - Bursae, excision of bursa, olecranon  
1452 - Muscles, gastrocnemius, recession, at calf  
1471 - Arthroscopy, hip with therapeutic intervention  
1511/1519 - Incision, tendon sheath, drainage for acute tenosynovitis  
1525 - Incision, humerus, lateral epicondyle, stripping for "tennis elbow"  
1531 - Incision, iliotibial band, division, open operation  
1535 - Incision, tenotomy, corrective, single digit, subcutaneous  
1552 - Excision, tendon or fibrous sheath, excision of lesion, digits only  
1553 - Excision, tendon or fibrous sheath, excision of lesion, other locations  
1570/1573/1574 - Excision, fasciotomy  
1580/1582/1583 - Extensor tendon, repair or suture  
1585/1586 - Transfer or transplant, or free graft  
1589 - Tendon, lengthening or shortening  
1593 - Transfer or transplant, or free graft, multiple transfer, for peripheral nerve palsy  
1612/1613 - Fascial graft, free, for reconstruction of tendon or repair bowstring  
1632/1633/1635/1640/1641/1654/1659/1661 - Repair, patellar advancement  
1670 - Peritalar arthroscopy, regardless of portals used  
1671 - Second peritalar joint arthroscopy  
1725/1740/1742/1743/1767/1802/1819 - Amputation  
1820 - Arthroscopic radiocarpal joint  
1893 - Plaster casts, cylinder cast (ankle to thigh)  
1897 - Plaster casts, ambulatory leg cast, long leg  
2593 - Wound or injury of major artery, repair peripheral vessels, suture  
3577 - Laparotomy for trauma  
3631/3633/3635 - Hernias, inguinal  
3660/3661 - Hernias, ventral  
3663 - Hernias, epigastric  
3666 - Hernias, umbilical  
5200 - Laminectomy for decompression of spinal cord, bilateral, first level  
5203 - Laminotomy, intervertebral discs, excision anterior approach, cervical  
5205 - Laminectomy, for decompression of the spinal cord, unilateral, first level  
5284/5286/5287/5292/5293 - Suture of nerves  
5353 - Intraplexal intrafascicular nerve transfers  
5356 - Extraplexal intrafascicular peripheral nerve transfers
